# Supplementary material for: Refinement of the rKLi8.3 Based Serodiagnostic Elisa Allows Detection of Canine Visceral Leishmaniasis in Dogs with Low Antibody Titers
Source: Preprints.org preprint supplement (doi:10.20944/preprints202401.1782.v1), 2024-01-24
Supplement: Supplementary file 4 [file supplementary]

Supplemental Table 1. DPP. LFT and rKLi8.3-ELISA were negative for all healthy control samples.

| **Controls** | **DPP** | **LFT** | **rKLi8.3-ELISA** |
| --- | --- | --- | --- |
| C 02 | − | − | − |
| C 03 | − | − | − |
| C 04 | − | − | − |
| C 05 | − | − | − |
| C 06 | − | − | − |
| C 07 | − | − | − |
| C 08 | − | − | − |
| C 09 | − | − | − |
| C 10 | − | − | − |
| C 11 | − | − | − |
| C 12 | − | − | − |
| C 13 | − | − | − |
| C 14 | − | − | − |
| C 15 | − | − | − |
| C 17 | − | − | − |
| C 18 | − | − | − |
| C 19 | − | − | − |
| C 21 | − | − | − |
| C 22 | − | − | − |
| C 23 | − | − | − |
| C 24 | − | − | − |
| C 25 | − | − | − |

DPP = Dual Path Platform (DPP®, Biomanguinhos, Fiocruz-RJ, Brazil). LFT = Lateral flow test (INgezim® Leishma CROM, GSD Madrid, Spain). ELISA = rKLi8.3-ELISA (GSD Frankfurt, Germany).

- = negative test.
